# Supplementary material for: Tunable collinear-to-canted antiferromagnetic transition in Co( ii )-based MOFs through structural control of linker length
Source: Royal Society of Chemistry journal article supplement (doi:10.1039/d5qi01974e), 2025-12-02
Supplement: d5qi01974e2.xlsx [file d5qi01974e2.xlsx]

## Sheet: Co2Cl2(BBTA)
[MT curve at 1000 Oe]						[MH curve at 2K]				[MH curve at 5K]
Temperature (K)	χ (emu mol-1 Oe-1)	1/χ (mol Oe emu-1)	Effective magnetic moment μeff (μB)			Magnetic Field (Oe)	Magnetization (emu g-1)			Magnetic Field (Oe)	Magnetization (emu g-1)
299.755	0.01195	83.6536	5.35139			70000.1	20.6751			70000.4	20.1135
294.968	0.0122	81.962	5.36299			67500.5	19.9333			67500.1	19.4021
290.004	0.01237	80.8327	5.35468			65000.2	19.2084			65000.3	18.6996
285.034	0.01252	79.894	5.3397			62500.3	18.5021			62500.2	17.9967
280.051	0.0127	78.711	5.33245			60000.1	17.8096			60000.3	17.3091
275.065	0.01298	77.0386	5.34182			57500.3	17.1393			57500.3	16.6184
270.081	0.01319	75.8133	5.33581			55000.2	16.4826			55000.4	15.9333
265.091	0.01332	75.0859	5.31183			52500.4	15.8383			52500.3	15.2529
260.102	0.01355	73.8274	5.30627			50000.3	15.208			50000.4	14.5763
255.105	0.01377	72.6035	5.29915			47500.3	14.5773			47500.4	13.8977
250.099	0.01405	71.179	5.29915			45000.3	13.9613			45000.3	13.2192
245.105	0.01428	70.0249	5.28903			42500.2	13.3559			42500.3	12.5451
240.117	0.01458	68.5648	5.29038			40000.3	12.7268			40000.4	11.8615
235.118	0.01485	67.3465	5.28216			37500.3	12.1152			37500.3	11.1806
230.12	0.01511	66.1606	5.27234			35000.4	11.481			35000.3	10.4937
220.097	0.01569	63.7514	5.25277			32500.3	10.8413			32500.3	9.80168
210.086	0.0163	61.3336	5.23209			30000.4	10.1854			30000.2	9.10004
200.069	0.01698	58.8952	5.21045			27500.1	9.50628			27500.4	8.3957
190.063	0.01766	56.6241	5.17933			25000.3	8.8261			25000.1	7.6795
180.044	0.01843	54.2497	5.15011			22500.3	8.14884			22500.3	6.95619
170.047	0.01932	51.7659	5.12376			20000.1	7.39836			20000.3	6.22719
160.034	0.02022	49.4663	5.08484			18000.3	6.78949			18000.2	5.65103
150.033	0.02127	47.008	5.05048			16000.3	6.14625			16000.3	5.04515
140.033	0.02254	44.364	5.02255			14000.2	5.45609			14000.2	4.43569
130.024	0.02385	41.9334	4.97803			12000.4	4.76411			12000.4	3.81595
120.018	0.02528	39.5568	4.92423			10000.3	4.03544			10000.4	3.19118
110.011	0.02699	37.0451	4.87168			9000.39	3.59221			9000.32	2.88097
100.021	0.02872	34.8137	4.79179			8000.37	3.20682			8000.3	2.56504
95.0342	0.02976	33.6022	4.75425			7000.37	2.82042			7000.37	2.24645
90.0298	0.03083	32.4389	4.70962			6000.48	2.43045			6000.26	1.92919
85.0351	0.03201	31.2376	4.66429			5000.16	2.03401			5000.37	1.60707
80.0335	0.03327	30.061	4.61275			4500.33	1.83341			4500.37	1.44707
75.0449	0.03466	28.8524	4.55927			4000.29	1.63395			4000.4	1.28606
70.046	0.03616	27.657	4.49899			3500.21	1.43026			3500.23	1.12567
65.0475	0.03776	26.4845	4.43042			3000.31	1.22885			3000.4	0.96492
60.0401	0.03966	25.2148	4.36233			2500.42	1.0227			2500.23	0.80321
55.0339	0.04175	23.9499	4.28538			2000.34	0.81683			2000.17	0.64185
50.0306	0.04417	22.6388	4.20259			1500.15	0.61136			1500.3	0.48044
45.0271	0.04693	21.31	4.10933			1000.23	0.40571			1000.17	0.31871
40.022	0.0502	19.9222	4.00688			900.311	0.36574			900.139	0.28672
35.0318	0.05404	18.5039	3.88978			800.217	0.32404			800.409	0.25441
30.0435	0.05872	17.0288	3.755			700.337	0.28237			700.208	0.22204
28.0487	0.06087	16.4273	3.69402			600.35	0.24157			600.414	0.18973
26.0487	0.06313	15.8395	3.62534			500.277	0.20013			500.042	0.15722
24.0541	0.06568	15.2244	3.55344			400.312	0.15938			400.376	0.12493
22.0588	0.06842	14.6148	3.47312			300.132	0.11811			300.046	0.09233
20.051	0.07151	13.9847	3.38506			200.124	0.07671			200.252	0.05992
18.0518	0.07477	13.3741	3.28438			100.223	0.03522			100.115	0.02749
16.0484	0.07836	12.7613	3.17026			0.0857	-0.00617			0.29994	-0.00495
14.0489	0.08221	12.1635	3.03821
12.0589	0.08638	11.5772	2.8852
10.0767	0.09097	10.9929	2.70664
9.08154	0.09355	10.6894	2.60573
8.0987	0.0963	10.3843	2.49658
7.11656	0.09973	10.0267	2.38167
6.16164	0.10395	9.61997	2.26249
5.2133	0.10996	9.0944	2.1404
4.28569	0.119	8.40339	2.01887
3.42158	0.13259	7.54215	1.90411
3.41975	0.13232	7.55722	1.9017
3.11617	0.14192	7.04631	1.87999

## Sheet: Co2Cl2(BTDD)
[MT curve at 1000 Oe]						[MH curve at 2K]				[MH curve at 5K]
Temperature (K)	χ (emu mol-1 Oe-1)	1/χ (mol Oe emu-1)	Effective magnetic moment μeff (μB)			Magnetic Field (Oe)	Magnetization (emu g-1)			Magnetic Field (Oe)	Magnetization (emu g-1)
299.753	0.00625	160.051	3.86882			70000.4	7.57141			70000.2	7.51985
290.04	0.00641	156.095	3.85355			67500.3	7.29345			67500.4	7.26435
280.06	0.0066	151.499	3.84367			65000.3	7.0205			65000.4	6.99889
270.078	0.00679	147.325	3.82765			62500.2	6.75265			62500.3	6.74391
260.105	0.00701	142.7	3.8167			60000.3	6.49077			60000.3	6.49257
250.11	0.00723	138.341	3.80116			57500.3	6.23134			57500.3	6.23913
240.1	0.00748	133.7	3.7884			55000.3	5.97701			55000.4	5.98754
230.092	0.00775	129.057	3.77473			52500.3	5.72455			52500.3	5.7368
220.065	0.00803	124.539	3.75792			50000.1	5.478			50000.2	5.48484
210.046	0.00834	119.863	3.74232			47500.4	5.2379			47500.3	5.25128
200.037	0.0087	114.996	3.72855			45000.3	4.99136			45000.3	4.99043
190.03	0.00909	110.064	3.71461			42500.3	4.75013			42500.4	4.73671
180.027	0.0095	105.236	3.69755			40000.4	4.51077			40000.4	4.49251
170.023	0.00995	100.474	3.67751			37500.1	4.27174			37500.2	4.22925
160.026	0.01046	95.628	3.65703			35000.1	4.03656			35000.2	3.98353
150.02	0.01103	90.644	3.6369			32500.3	3.79459			32500.1	3.73061
140.023	0.01164	85.8802	3.60977			30000.3	3.55407			30000.3	3.47588
130.028	0.01234	81.0375	3.58097			27500.3	3.31111			27500.2	3.22423
120.017	0.01313	76.1878	3.54817			25000.3	3.06601			25000	2.96423
110.005	0.01399	71.4773	3.50711			22500.4	2.8161			22500.4	2.6972
100.022	0.01498	66.7389	3.46087			20000.2	2.56142			20000.3	2.42725
95.0299	0.01555	64.3239	3.43613			18000.4	2.3498			18000.3	2.2079
90.0306	0.01615	61.9219	3.40878			16000.3	2.13359			16000.3	1.98548
85.0286	0.0168	59.5091	3.37922			14000.4	1.91199			14000.3	1.75558
80.0387	0.01751	57.1116	3.34668			12000.4	1.68122			12000.1	1.52206
75.0386	0.01827	54.7245	3.31038			10000.3	1.44242			10000.3	1.28212
70.0464	0.01911	52.315	3.27119			9000.21	1.31084			9000.3	1.16022
65.0478	0.02005	49.8682	3.22872			8000.28	1.18187			8000.37	1.03688
60.0316	0.02109	47.4055	3.18128			7000.39	1.06547			7000.35	0.91191
55.0266	0.02228	44.888	3.13002			6000.29	0.92442			6000.16	0.78531
50.0302	0.02361	42.3464	3.0728			5000.46	0.77905			5000.2	0.65707
45.0316	0.02516	39.7446	3.00916			4500.23	0.71106			4500.37	0.59236
40.016	0.02699	37.0468	2.93811			4000.4	0.63528			4000.27	0.5275
35.023	0.02914	34.3184	2.85587			3500.29	0.55927			3500.33	0.46228
30.0377	0.03178	31.4704	2.7619			3000.14	0.48194			3000.21	0.39679
28.0444	0.03296	30.3358	2.71814			2500.29	0.40401			2500.29	0.33093
26.0453	0.03429	29.1658	2.67149			2000.3	0.32523			2000.21	0.26491
24.0444	0.0357	28.0128	2.61912			1500.15	0.24472			1500.12	0.19847
22.0579	0.03723	26.857	2.562			1000.23	0.16323			1000.28	0.13183
20.0496	0.03893	25.6856	2.49766			900.439	0.14696			900.289	0.11861
18.047	0.04074	24.5436	2.42415			800.452	0.13072			800.431	0.10519
16.0526	0.04265	23.445	2.33923			700.294	0.11434			700.315	0.09185
14.0527	0.04466	22.3912	2.23958			600.393	0.09793			600.371	0.07848
12.0542	0.04664	21.4396	2.11976			500.256	0.0813			500.363	0.0651
10.0699	0.04873	20.521	1.98034			400.462	0.0647			400.14	0.05161
9.07364	0.04988	20.0486	1.90184			300.218	0.04806			300.239	0.03823
8.08788	0.05106	19.5833	1.81677			199.995	0.0313			200.145	0.02479
7.10651	0.05255	19.0287	1.72762			100.008	0.01452			100.18	0.01139
6.155	0.05435	18.3994	1.63508			0.17139	-0.00224			0.21424	-0.00206
5.19223	0.05701	17.5405	1.53809			-100.094	-0.01912			-99.9441	-0.01553
4.2642	0.06084	16.4359	1.43995			-199.91	-0.03594			-199.952	-0.02898
3.50128	0.06603	15.1449	1.35927			-299.832	-0.05269			-299.896	-0.04241
3.48938	0.06797	14.7128	1.37674			-399.99	-0.06956			-400.033	-0.05584
3.112	0.07678	13.0238	1.3819			-500.02	-0.08627			-499.956	-0.06921
						-600.114	-0.10285			-600.114	-0.08265
						-700.251	-0.11954			-700.23	-0.09604
						-800.002	-0.13602			-799.981	-0.1094
						-900.139	-0.15257			-900.311	-0.1228
						-1000.19	-0.16917			-1000.06	-0.13605
						-1500.17	-0.25109			-1500.21	-0.20281
						-2000.3	-0.33146			-2000.08	-0.26899
						-2500.17	-0.41166			-2500.36	-0.33481
						-3000.21	-0.48963			-3000.21	-0.40046
						-3500.23	-0.56586			-3500.38	-0.46574
						-4000.01	-0.64034			-4000.23	-0.53057
						-4500.12	-0.7137			-4500.2	-0.59543
						-5000.2	-0.7857			-5000.16	-0.65993
						-6000.31	-0.9266			-6000.24	-0.78759
						-7000.35	-1.06261			-7000.35	-0.91419
						-8000.24	-1.19391			-8000.32	-1.03898
						-9000.21	-1.32172			-9000.08	-1.1626
						-10000.3	-1.44648			-10000.2	-1.2848
						-12000.3	-1.6939			-12000.3	-1.52336
						-14000.3	-1.92349			-14000.4	-1.7577
						-16000.3	-2.14487			-16000.2	-1.98837
						-18000.2	-2.35996			-18000.2	-2.21187
						-20000.2	-2.56992			-20000.3	-2.43166
						-22500.4	-2.82646			-22500.2	-2.70318
						-25000.3	-3.07642			-25000.4	-2.9668
						-27500.3	-3.32247			-27500.4	-3.2276
						-30000.3	-3.56514			-30000.4	-3.48674
						-32500.4	-3.80392			-32500.5	-3.73985
						-35000.3	-4.04428			-35000.2	-3.99312
						-37500.2	-4.28348			-37500.2	-4.24293
						-40000.3	-4.52196			-40000.4	-4.49188
						-42500.2	-4.76012			-42500.3	-4.74321
						-45000.3	-4.99993			-45000.3	-4.99233
						-47500.2	-5.24252			-47500.3	-5.25561
						-50000.4	-5.4899			-50000.2	-5.48671
						-52500.4	-5.73851			-52500.3	-5.73721
						-55000.1	-5.99056			-55000.2	-5.99236
						-57500.4	-6.24291			-57500.3	-6.2403
						-60000.2	-6.50275			-60000.4	-6.49496
						-62500.2	-6.76534			-62500.3	-6.75332
						-65000.3	-7.03461			-65000.3	-7.00855
						-67500.3	-7.30507			-67500.2	-7.27196
						-70000.3	-7.5875			-70000.4	-7.5279
						-67500.3	-7.30591			-70000.2	-7.51985
						-65000.2	-7.03189			-67500.4	-7.26435
						-62500.3	-6.76492			-65000.4	-6.99889
						-60000.4	-6.50125			-62500.3	-6.74391
						-57500.3	-6.24205			-60000.3	-6.49257
						-55000.2	-5.97902			-57500.3	-6.23913
						-52500.2	-5.73557			-55000.4	-5.98754
						-50000.2	-5.48795			-52500.3	-5.7368
						-47500.3	-5.24303			-50000.2	-5.48484
						-45000.1	-4.99626			-47500.3	-5.25128
						-42500.4	-4.75929			-45000.3	-4.99043
						-40000.3	-4.51955			-42500.4	-4.73671
						-37500.4	-4.28178			-40000.4	-4.49251
						-35000.3	-4.04359			-37500.2	-4.22925
						-32500.3	-3.80501			-35000.2	-3.98353
						-30000.3	-3.56403			-32500.1	-3.73061
						-27500.4	-3.32193			-30000.3	-3.47588
						-25000.4	-3.07936			-27500.2	-3.22423
						-22500.2	-2.82702			-25000	-2.96423
						-20000.2	-2.57446			-22500.4	-2.6972
						-18000.3	-2.36369			-20000.3	-2.42725
						-16000.3	-2.14866			-18000.3	-2.2079
						-14000.4	-1.92888			-16000.3	-1.98548
						-12000.1	-1.70216			-14000.3	-1.75558
						-10000.4	-1.46163			-12000.1	-1.52206
						-9000.39	-1.32986			-10000.3	-1.28212
						-8000.37	-1.20007			-9000.3	-1.16022
						-7000.33	-1.06811			-8000.37	-1.03688
						-6000.18	-0.93063			-7000.35	-0.91191
						-5000.48	-0.78972			-6000.16	-0.78531
						-4500.31	-0.7167			-5000.2	-0.65707
						-4000.4	-0.64251			-4500.37	-0.59236
						-3500.21	-0.56667			-4000.27	-0.5275
						-3000.34	-0.48905			-3500.33	-0.46228
						-2500.17	-0.41089			-3000.21	-0.39679
						-2000.27	-0.33054			-2500.29	-0.33093
						-1500.4	-0.24904			-2000.21	-0.26491
						-1000.38	-0.16606			-1500.12	-0.19847
						-900.332	-0.1498			-1000.28	-0.13183
						-800.409	-0.1333			-900.289	-0.11861
						-700.23	-0.11661			-800.431	-0.10519
						-600.243	-0.09979			-700.315	-0.09185
						-500.32	-0.08285			-600.371	-0.07848
						-400.14	-0.06583			-500.363	-0.0651
						-300.132	-0.04883			-400.14	-0.05161
						-200.317	-0.03187			-300.239	-0.03823
						-100.201	-0.01483			-200.145	-0.02479
						-0.29994	0.00215			-100.18	-0.01139
						99.8155	0.01923			-0.21424	0.00206
						199.91	0.03638			99.9441	0.01553
						299.854	0.05345			199.952	0.02898
						399.926	0.07045			299.896	0.04241
						499.849	0.08735			400.033	0.05584
						599.986	0.10426			499.956	0.06921
						700.123	0.12111			600.114	0.08265
						799.959	0.13797			700.23	0.09604
						900.075	0.15464			799.981	0.1094
						1000.19	0.17122			900.311	0.1228
						1500.38	0.2541			1000.06	0.13605
						2000.4	0.33427			1500.21	0.20281
						2500.19	0.41414			2000.08	0.26899
						3000.14	0.49288			2500.36	0.33481
						3500.12	0.56945			3000.21	0.40046
						4000.08	0.64456			3500.38	0.46574
						4500.2	0.71856			4000.23	0.53057
						5000.37	0.79194			4500.2	0.59543
						6000.33	0.93303			5000.16	0.65993
						7000.41	1.06851			6000.24	0.78759
						8000.17	1.20022			7000.35	0.91419
						9000.21	1.3289			8000.32	1.03898
						10000.2	1.4519			9000.08	1.1626
						12000.2	1.69726			10000.2	1.2848
						14000.2	1.92831			12000.3	1.52336
						16000.2	2.14998			14000.4	1.7577
						18000.3	2.36546			16000.2	1.98837
						20000.4	2.57442			18000.2	2.21187
						22500.3	2.82922			20000.3	2.43166
						25000.3	3.07869			22500.2	2.70318
						27500.2	3.324			25000.4	2.9668
						30000.4	3.56689			27500.4	3.2276
						32500.3	3.80728			30000.4	3.48674
						35000.3	4.04719			32500.5	3.73985
						37500.3	4.28809			35000.2	3.99312
						40000.2	4.5225			37500.2	4.24293
						42500.4	4.76273			40000.4	4.49188
						45000.1	5.00389			42500.3	4.74321
						47500.3	5.24506			45000.3	4.99233
						50000.3	5.4901			47500.3	5.25561
						52500.3	5.73737			50000.2	5.48671
						55000.3	5.98777			52500.3	5.73721
						57500.3	6.24795			55000.2	5.99236
						60000.2	6.5032			57500.3	6.2403
						62500.2	6.76593			60000.4	6.49496
						65000.3	7.0358			62500.3	6.75332
						67500.4	7.31			65000.3	7.00855
						70000.1	7.58911			67500.2	7.27196
										70000.4	7.5279
